# Supplementary material for: Enhancing photocatalytic CO 2 reduction and biological activity using a silver nanoparticle-decorated ZnTiO 3 /permutit composite
Source: Royal Society of Chemistry journal article supplement (doi:10.1039/d5nj04289e), 2026-01-01
Supplement: d5nj04289e1.pdf [file d5nj04289e1.pdf]

**Enhancing Photocatalytic CO<sub>2</sub> Reduction and Biological Activity Using Silver  
Nanoparticles Decorated ZnTiO<sub>3</sub>/Permutit Composite**

Mohsen Padervand<sup>a,\*</sup>, Alireza Bargahi<sup>b</sup>, Zohreh Jahanafrooz<sup>c</sup>, Zahra Fathi<sup>c</sup>, Mohammad Nikkhoo<sup>a</sup>, Sima Hajiahmadi<sup>d</sup>, Abdelkader Labidi<sup>\*e</sup>, Elmuez Dawif, Somayeh Taghavi<sup>g</sup>

<sup>a</sup>Department of Chemistry, Faculty of Science, University of Maragheh, P.O. Box 55181-83111, Maragheh, Iran

<sup>b</sup>Faculty of Chemistry, Razi University, Kermanshah 67149, Iran

<sup>c</sup>Department of Biology, Faculty of Science, University of Maragheh, P.O. Box 55181-83111, Maragheh, Iran

<sup>d</sup>Department of Clinical Biochemistry, Shahid Beheshti University of Medical Sciences, Tehran, P. O. Box 19615-1178, Iran

<sup>e</sup>School of Environmental Science and Engineering, Shaanxi University of Science and Technology, Xi'an 710021, China

<sup>f</sup>College of Humanities and Sciences, Department of Mathematics, and Science, Ajman University, P.O. Box 346, Ajman, United Arab Emirates

<sup>g</sup>Faculty of Chemistry, University of Mazandaran, 47416-95447 Babolsar, Iran

Corresponding author: Mohsen Padervand, Email: [padervand@maragheh.ac.ir](mailto:padervand@maragheh.ac.ir),  
[mohsenpadervand@gmail.com](mailto:mohsenpadervand@gmail.com)

## **Precursors**

Permutit (PT) zeolite powder, purchased from Aladdin, was used in this study. Zinc nitrate ( $\text{Zn}(\text{NO}_3)_2 \cdot 6\text{H}_2\text{O}$ ) and potassium titanyl oxalate ( $\text{C}_4\text{K}_2\text{O}_9\text{Ti} \cdot 2\text{H}_2\text{O}$ ) were obtained from Sigma Aldrich. Hydrogen peroxide ( $\text{H}_2\text{O}_2$ ), ethylene glycol ( $(\text{CH}_2\text{OH})_2$ ), nitric acid ( $\text{HNO}_3$ ), trisodium citrate ( $\text{Na}_3\text{C}_6\text{H}_5\text{O}_7$ , 98%), dilute ammonium hydroxide solution ( $\text{NH}_4\text{OH}$  5% solution), and silver nitrate ( $\text{AgNO}_3$ ) were sourced from Merck Co. Gibco in Germany provided Nutrient agar, Nutrient broth, NaCl DMEM low glucose medium culture, streptomycin, Trypsin/EDTA, and penicillin. MTT dye and dimethyl sulfoxide (DMSO) were purchased from Sigma-Aldrich in Munich, Germany.

## **Characterization method**

The crystalline phases were analyzed by XRD spectra (Bruker D8 Advance, Cu  $\text{K}\alpha$  radiation). FTIR spectra were acquired using a Bruker Vertex 70 spectrophotometer. Morphology and texture were examined via FESEM (XL30 model with EDX), while XPS spectra were obtained using a Shimadzu-Amics instrument. EPR spectra were measured with a Bruker E500 spectrometer, and electronic bandgaps were determined using a Shimadzu Solidspec-3700 DUV spectrometer.

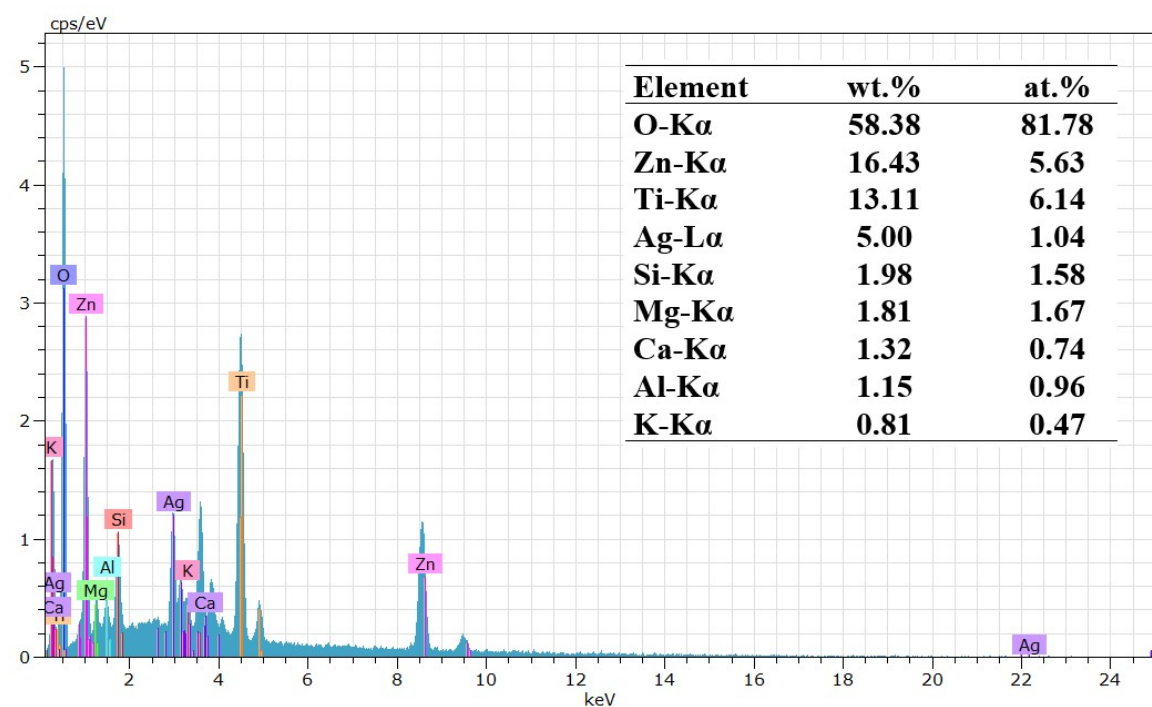

**Figure S1.** EDX spectrum (inset: weight % and atomic % table) of Ag/ZnTiO<sub>3</sub>/PT.

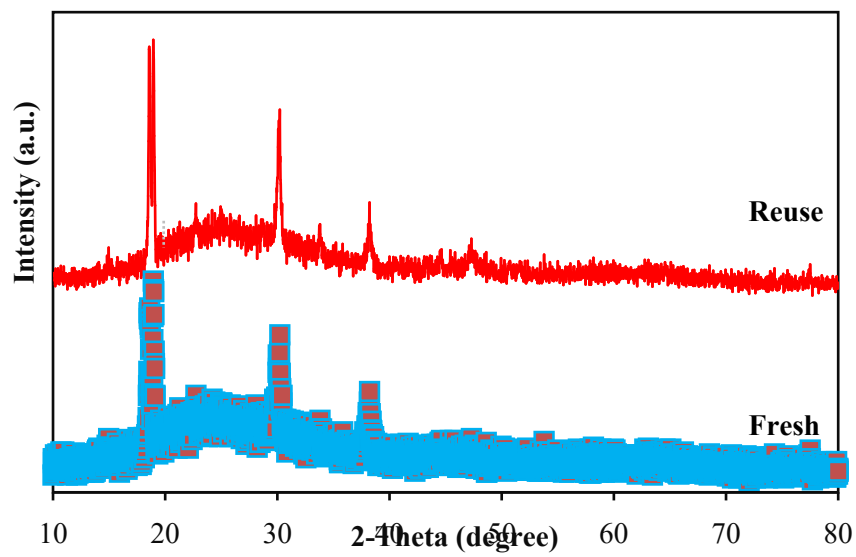

**Figure S2.** XRD patterns of the Ag/ZnTiO<sub>3</sub>/PT composite before (Fresh) and after (Reuse) the recycling experiment.

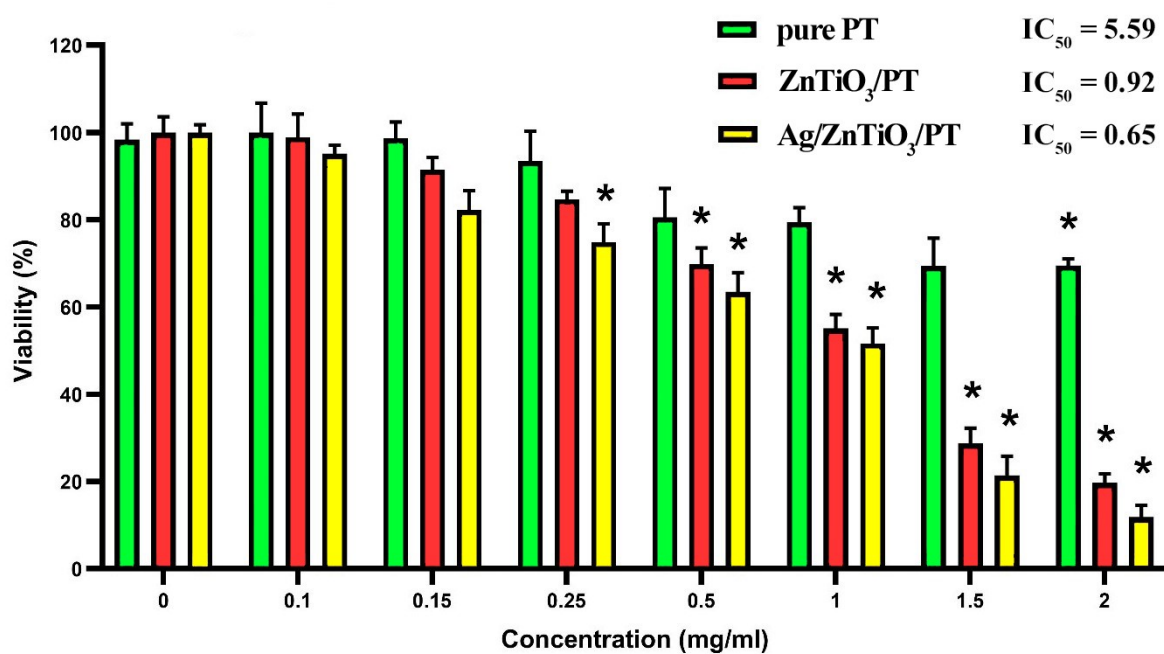

**Figure S3.** Assessment of ZnTiO<sub>3</sub>/PT and Ag/ZnTiO<sub>3</sub>/PT effects on MDA-MB-231 cell viability using the MTT assay after 24 h. Results are mentioned as mean  $\pm$  SD from at least three independent experiments (\*  $P \leq 0.05$ ). 50% inhibitory concentrations were depicted.

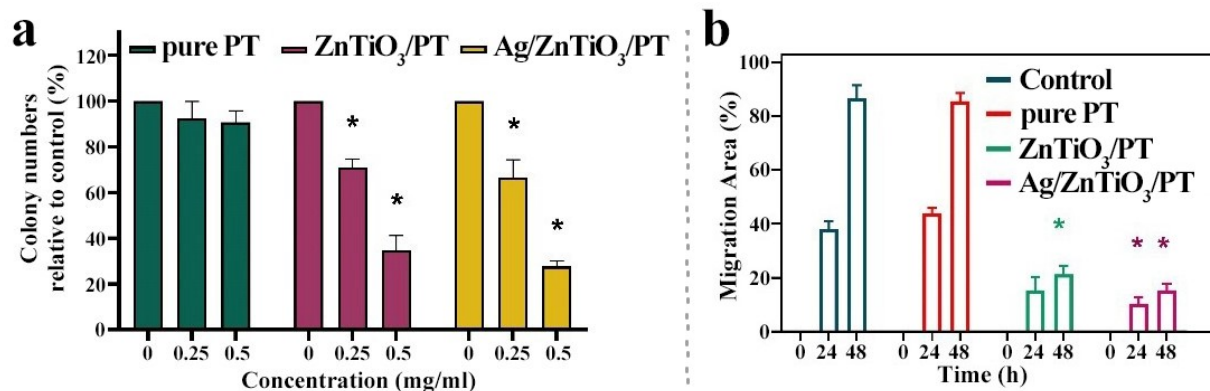

**Figure S4.** The bar graph (a) shows the colony percentage formed at various concentrations of ZnTiO<sub>3</sub>/PT and Ag/ZnTiO<sub>3</sub>/PT. The bar chart (b) represents a quantitative analysis of scratch closure changes. Compared to control, ZnTiO<sub>3</sub>/PT and Ag/ZnTiO<sub>3</sub>/PT treatments significantly showed anti-migratory effects on cells. Data are mean  $\pm$  SD (\* $P$  < 0.05) of three experiments.

**Table S1.** The performance of Ag/ZnTiO<sub>3</sub>/PT for photocatalytic CO<sub>2</sub>RR using water vapor as reducing agent in comparison to previously-reported catalysts.

| Sample                                                             | Irradiation source    | Products            | Yields ( $\mu\text{mol g}^{-1} \text{ h}^{-1}$ ) | CO selectivity | References |
|--------------------------------------------------------------------|-----------------------|---------------------|--------------------------------------------------|----------------|------------|
| Ag-TiO <sub>2</sub> /Zeolite TS-1                                  | UV-Vis <sup>a</sup>   | CH <sub>4</sub> /CO | 0.47/3.16                                        | ~87%           | 1          |
| TiO <sub>2</sub> /ZnO                                              | UV-Vis <sup>a</sup>   | CH <sub>4</sub> /CO | 12.87/2.13                                       | ~14%           | 2          |
| Ag <sub>3.0%</sub> /TiO <sub>2</sub>                               | UV-Vis <sup>a</sup>   | CH <sub>4</sub> /CO | 17.2/44.1                                        | ~72%           | 3          |
| Cu NCs/defective TiO <sub>2</sub>                                  | UV-Vis <sup>a</sup>   | CH <sub>4</sub> /CO | 19.63/2.0                                        | ~9%            | 4          |
| Zeolite HZSM-5                                                     | UV <sup>b</sup>       | H <sub>2</sub> /CO  | 0.65/3.32                                        | ~84%           | 5          |
| Zn <sub>2</sub> Ti <sub>3</sub> O <sub>8</sub> /ZnTiO <sub>3</sub> | UV <sup>c</sup>       | CH <sub>4</sub> /CO | 0.56/3.68                                        | ~87%           | 6          |
| P25 (TiO <sub>2</sub> )                                            | Visible <sup>a*</sup> | CH <sub>4</sub> /CO | 0.16/0.53                                        | ~77%           | 7          |
| SnO/CSO                                                            | Visible <sup>a*</sup> | CH <sub>4</sub> /CO | 1.18/10.8                                        | ~90%           | 8          |
| Ag/ZnTiO <sub>3</sub> /PT                                          | Visible <sup>a*</sup> | CH <sub>4</sub> /CO | 0.73/13.01                                       | ~95%           | This work  |

<sup>a</sup> 300 W Xe lamp; <sup>b</sup> fluorescent UV tube; <sup>c</sup> Philips TUV 4W; \* with a  $\lambda \geq 420$  nm cut-off filter.

**Table S2.** MICs and MBCs for pure PT, ZnTiO<sub>3</sub>/PT, and Ag/ZnTiO<sub>3</sub>/PT nanocomposites on *P. aeruginosa* and *S. aureus* in mg/mL.

| Sample                    | <i>S. aureus</i> |     | <i>P. aeruginosa</i> |     |
|---------------------------|------------------|-----|----------------------|-----|
|                           | MIC              | MBC | MIC                  | MBC |
| pure PT                   | 2                | -   | 4                    | -   |
| ZnTiO <sub>3</sub> /PT    | 0.5              | 2   | 2                    | 4   |
| Ag/ZnTiO <sub>3</sub> /PT | 0.5              | 1   | 1                    | 2   |



## References

- 1 Y. Sun, G. Li, Y. Gong, Z. Sun, H. Yao and X. Zhou, *J. Hazard. Mater.*, 2021, **403**, 124019.
- 2 K. Wu, X. Dong, J. Zhu, P. Wu, C. Liu, Y. Wang, J. Wu, J. Hou, Z. Liu and X. Guo, *J. Mater. Sci.*, 2018, **53**, 11595–11606.
- 3 S. Liu, Q. Zhou, D. Wen, C. Wu, Y. Pan, X. Liu, Z. Huang and N. Li, *ACS Catal.* , 2024, **14**, 8105–8115.
- 4 M. Zhang, Y. Mao, X. Bao, P. Wang, Y. Liu, Z. Zheng, H. Cheng, Y. Dai, Z. Wang and B. Huang, *ACS Catal.* , 2024, **14**, 5275–5285.
- 5 Y. Tong, Y. Zhang, N. Tong, Z. Zhang, Y. Wang, X. Zhang, S. Zhu, F. Li and X. Wang, *Catal. Sci. Technol.*, 2016, **6**, 7579–7585.
- 6 J. Lu, D. Li, Y. Chai, L. Li, M. Li, Y. Zhang and J. Liang, *Appl. Catal. B Environ.*, 2019, **256**, 117800.
- 7 Y. Y. Lee, H. S. Jung, J. M. Kim and Y. T. Kang, *Appl. Catal. B Environ.*, 2018, **224**, 594–601.
- 8 M. Padervand, A. Bargahi, B. Eftekhari-Sis, M. Saadi, S. Ghasemi, E. A. Dawi, A. Labidi, G. Mahmoudi and M. Servati Gargari, *Results Eng.*, 2024, **23**, 102515.
